# Supplementary material
Source: publisher figshare collection journal article supplement (https://sage.figshare.com/ndownloader/files/21599592)
Supplement: Supplementary file 1 [file 21599592]

Table 1

*Characteristics of Included Studies*

| <b>First Author</b> | <b>Origin/year</b> | <b>N/gender/age</b>                                                                                                               | <b>Measures: Attachment Measure (AM) and Epigenetic Focus (EF)</b>                                                                                                                                                  | <b>Main Theme (Aim(s))</b>                                                                                                                                  |
|---------------------|--------------------|-----------------------------------------------------------------------------------------------------------------------------------|---------------------------------------------------------------------------------------------------------------------------------------------------------------------------------------------------------------------|-------------------------------------------------------------------------------------------------------------------------------------------------------------|
| Tyrka               | US/2012            | 99/58 female/27.3(SD=10.4)                                                                                                        | AM: PBI<br>EF: NR3C1 promotor methylation                                                                                                                                                                           | Investigation of epigenetic changes caused by early life stress.                                                                                            |
| Haas                | Athens/2016        | 127/72 females/21.37 (SD=3.49)                                                                                                    | AM: ASQ<br>EF: DNA methylation of OXT (saliva)                                                                                                                                                                      | Association between sociability and epigenetic modifications in OXT                                                                                         |
| Jones-Mason         | USA/2016           | 101/82 female/M=19.8 Y                                                                                                            | AM: AAI<br>EF: SLC6A4 methylation of a serotonin receptor gene                                                                                                                                                      | Epigenetic markers as the link between environment and developmental processes.                                                                             |
| Lawn                | UK/2018            | ASPD: 989<br>Time point 1: 28.7 Y (SD=5.54)/female<br>Time point 2: 47.3 Y (SD=4.42)/female<br>NSHD: 773/ 53.4 Y (SD=0.16)/female | AM: SEP and Psychosocial adversity – before the age of 17 and cumulative<br>EF: DNA methylation age acceleration in adulthood                                                                                       | DNA methylation-based biomarkers as a measure of age acceleration – potential biological mechanism linking environmental exposures to later health outcomes |
| Ebner               | USA/2019           | 22 young/M=23.6, SD=2.95/40.9 %female<br>34 older/M=71.4, SD=4.82/55.9% female                                                    | Attachment: ECR<br>EF: OXTR Methylation                                                                                                                                                                             | The role of epigenetic modification of OXTR in individual differences (age-variability) in behavioral phenotypes.                                           |
| Unternaehrer        | Switzerland/ 2015  | 89/TABLE 1                                                                                                                        | Attachment measure: PBI<br>Epigenetic changes: DNA methylation in two stress-associated genes: two target sequences in the oxytocin receptor gene, OXTR and one in the brain-derived neurotrophic factor gene, BDNF | Maternal caregiving during childhood and association between high vs. low caregiving with DNA methylation in the BDNF and OXTR                              |
| Ein-Dor             | Israel/2018        | 109/56 female/23.75 Y (+/- 1.56)                                                                                                  | Attachment: AAS<br>Epigenetic changes: OXTR and NR3C1 promotor methylation                                                                                                                                          | The specific role of attachment in a epigenetic model of social proximity seeking and stress regulation                                                     |
| Mulder              | Netherlands/ 2017  | 298/gender?/14.58 M (SD=0.87)                                                                                                     | Attachment: SSP<br>Epigenetic changes: Methylation of FKBP5 in cord blood. (saliva – cortisol)                                                                                                                      | Examining how parent-child dyadic regulation works in epigenetic aspects of stress regulation.                                                              |

|                   |                      |                                                |                                                                                          |                                                                                                                                     |
|-------------------|----------------------|------------------------------------------------|------------------------------------------------------------------------------------------|-------------------------------------------------------------------------------------------------------------------------------------|
| Schechter         | Switzerland/<br>2016 | 70/35 mothers and<br>35<br>children/gender/age | Attachment: DAI<br>Epigenetic changes: HTR3A<br>gene methylation at CpG2_III             | Methylation status in<br>mothers linked to<br>maternal exposure to<br>violence, maternal<br>neural activity and<br>child attachment |
| Bosman            | Netherlands/<br>2017 | 487/56%<br>female/11.84<br>Y(SD=2.4)           | Attachment: ECR-RS<br>Epigenetic focus: NR3C1<br>methylation                             | The role of epigenetic<br>processes in<br>development of<br>attachment                                                              |
| Van<br>Ijzendoorn | Netherlands/<br>2010 | 143                                            | Attachment: AAI<br>Epigenetic focus: Methylation<br>of CpG sites at the 5HTTLPR<br>locus | The role of epigenetic<br>factors in individual<br>vulnerability                                                                    |

---

*PBI=Parental Bonding Index, ASQ=Attachment Style Questionnaire, OCD=Obsessive Compulsive Disorder, AAS=Adult Attachment Scale, SSP=Strange Situation Procedure, DAI=Disturbance of Attachment Interview, TSA=TrichoStatin A, ECR-RS=Experiences In Close Relationships – Relationship Structures Questionnaire, MSSP=Mouse Strange Situation Procedure, AAI=Adult Attachment Interview, OXTR=Oxytocin Receptor, ASPD=Avon Longitudinal Study of Parents and Children, NSPD=National Survey of Health and Development, SEP=socioeconomic position*
